# Supplementary material for: Obesity and Dietary Added Sugar Interact to Affect Postprandial GLP-1 and Its Relationship to Striatal Responses to Food Cues and Feeding Behavior
Source: PubMed Central journal article supplement (PMC8044510; doi:10.3389/fendo.2021.638504), 2021-03-31
Supplement: DataSheet_1.pdf [file DataSheet_1.pdf]

## Supplementary Material

### Results

#### Participants

Independent t-tests found no differences in age (completed=23.19 years, not completed=23.95 years,  $p=.72$ ) BMI (completed=27.19 kg/m<sup>2</sup>, not completed=30.36 kg/m<sup>2</sup>,  $p=.29$ ), or percent calories from added sugar (completed=9.26%, not completed=10.14%,  $p=.74$ ) between participants that completed the glucose food cue task relative to those that did not. Age (completed=23.29 years, not completed=21.85 years,  $p=.45$ ), BMI (completed=27.4 kg/m<sup>2</sup>, not completed=26 kg/m<sup>2</sup>,  $p=.59$ ), and dietary added sugar (completed=9.47%, not completed=6.52%,  $p=.2$ ) also did not differ between those that completed the water day food cue task and those that did not. Similarly, age (completed=23.17 years, not completed=23.73 years), BMI (completed=27.29 kg/m<sup>2</sup>, not completed=27.76 kg/m<sup>2</sup>,  $p=.82$ ), and percent calories from added sugar (completed=9.28%, not completed=9.62%,  $p=.85$ ) did not differ between subjects that completed the hormone collection on the glucose day vs those that did not and age (completed=23.1 years, not completed=23.94 years,  $p=.51$ ), BMI (completed=27.4 kg/m<sup>2</sup>, not completed=26.87 kg/m<sup>2</sup>,  $p=.76$ ), and percent calories from added sugar (completed=9.36%, not completed=8.96%,  $p=.79$ ) did not differ between participants that completed the hormone collection on the water day and those that did not. Characteristics of each subset of participants can be found in Supplemental Table 3.

Mean age, BMI, and dietary added sugar separated by BMI Status (lean, overweight, and obese) can be found in Supplemental Table 4a. Across weight groups a one-way ANOVA found there was no significant differences in age ( $F(2,69)=2.15$ ,  $p=.12$ ) or percent calories from added sugar ( $F(2,69)=1.7$ ,  $p=.19$ ). As expected, all three BMI Status groups were significantly different in BMI ( $F(2,69)=178.58$ ,  $p<.0001$ ). Descriptive characteristics for High vs Low Added Sugar can be found in Supplemental Table 4b. Independent samples t-tests found High vs Low Added Sugar did not differ in age (Low=23.4±3.89 years, High=22.95±3.54 years,  $p=.62$ ) or BMI (Low=27.45±5.59 kg/m<sup>2</sup>, High=27.15±4.45 kg/m<sup>2</sup>,  $p=.81$ ). The High Added Sugar group had consumed significantly greater percent added sugar than the Low Added Sugar group (Low=6.59±2.38%, High=13.49±3.99%,  $p<.0001$ ). A factorial ANOVA also found there were no significant interactions between BMI Status and High vs Low Added sugar on BMI ( $F(2,66)=.28$ ,  $p=.76$ ) or percent calories from added sugar ( $F(2,66)=.57$ ,  $p=.57$ ).

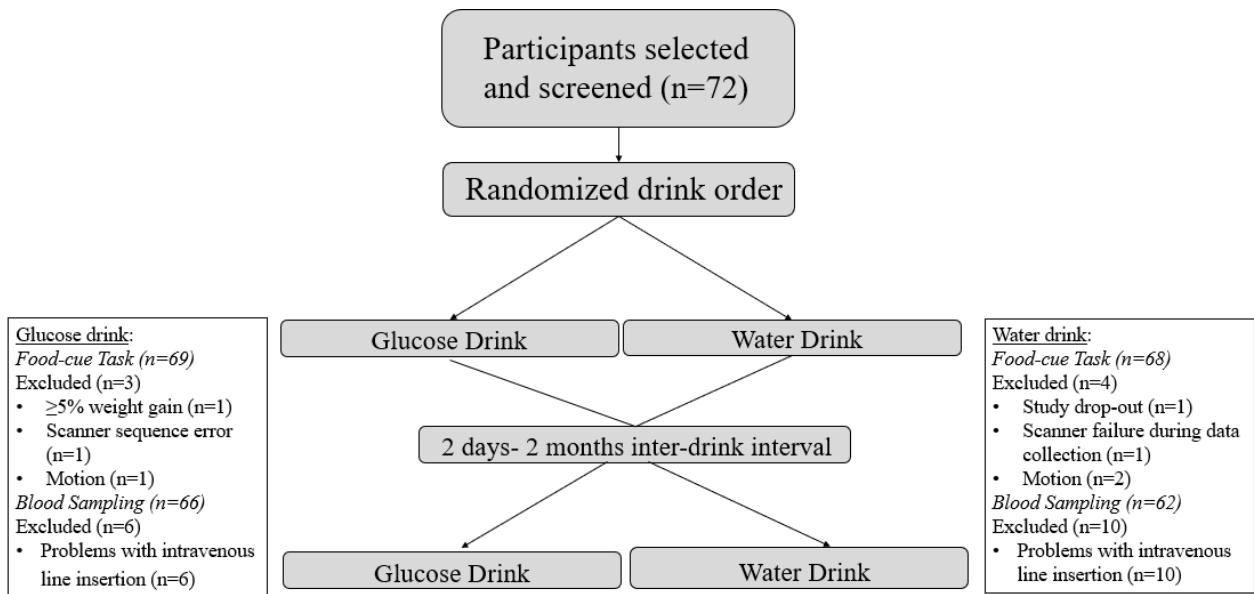

Supplemental Figure 1. Participant flow chart for the current sub-study.

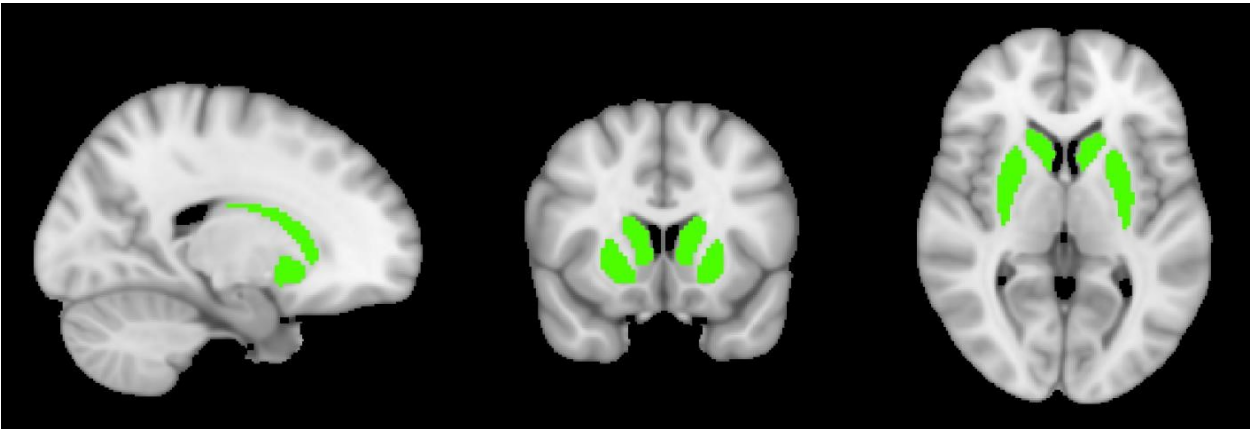

Supplemental Figure 2. Region of interest (ROI) mask of the left and right dorsal striatum derived from the Harvard-Oxford subcortical atlas.





**Supplemental Table 1: Visual Cues**

| <b>Food cue</b>       | <b>Food cue category</b> |
|-----------------------|--------------------------|
| Brownie               | High-calorie             |
| Burger                | High-calorie             |
| Chocolate bar         | High-calorie             |
| Chocolate chip cookie | High-calorie             |
| Cinnamon roll         | High-calorie             |
| Cupcake               | High-calorie             |
| Donut                 | High-calorie             |
| Fried chicken         | High-calorie             |
| Fries                 | High-calorie             |
| Gummies               | High-calorie             |
| Ice cream             | High-calorie             |
| Mac & cheese          | High-calorie             |
| M&Ms                  | High-calorie             |
| Pizza                 | High-calorie             |
| Potato chips          | High-calorie             |
| Taco                  | High-calorie             |
| Apple                 | Low-calorie              |
| Banana                | Low-calorie              |
| Bell pepper           | Low-calorie              |
| Blueberry             | Low-calorie              |
| Broccoli              | Low-calorie              |
| Carrots               | Low-calorie              |
| Chicken salad         | Low-calorie              |
| Cucumber              | Low-calorie              |
| Fruit salad           | Low-calorie              |
| Grape                 | Low-calorie              |
| Hummus                | Low-calorie              |
| Mixed fruit           | Low-calorie              |
| Orange                | Low-calorie              |
| Popcorn               | Low-calorie              |
| Salad                 | Low-calorie              |
| Salmon                | Low-calorie              |
| Basket                | Non-food                 |
| Bike                  | Non-food                 |
| Book                  | Non-food                 |
| Box                   | Non-food                 |
| Bucket                | Non-food                 |
| Bus                   | Non-food                 |
| Chair                 | Non-food                 |
| Dock                  | Non-food                 |
| Door                  | Non-food                 |
| Field                 | Non-food                 |
| Forest                | Non-food                 |
| Flower                | Non-food                 |
| Forest                | Non-food                 |
| Road                  | Non-food                 |
| Stair                 | Non-food                 |
| Stapler               | Non-food                 |
| Waterfall             | Non-food                 |

Supplemental Table 1. Visual cues used for the food cue task

**Supplemental Table 2: Buffet Foods**

| <b>Food</b>                       | <b>Approximate caloric content (kcal per gram)</b> |
|-----------------------------------|----------------------------------------------------|
| Lay's Potato Chips (1 bag)        | 5.46                                               |
| Doritos (Nacho Cheese) (1 bag)    | 4.96                                               |
| Sun Chips (Garden Salsa) (1 bag)  | 4.68                                               |
| Cheetos Crunchy (1 bag)           | 5.67                                               |
| Goldfish Crackers (1 bag)         | 4.74                                               |
| Skinny Pop Popcorn                | 5.01                                               |
| Oreos (4 cookies)                 | 4.72                                               |
| Famous Amos Minis (1 bag)         | 5.07                                               |
| Poptarts (1 pack)                 | 3.91                                               |
| Ritz Bitz Crackers (1 bag)        | 5.22                                               |
| Pretzels (1 bag)                  | 3.95                                               |
| Hummus (1)                        | 1.74                                               |
| M&Ms (Plain)                      | 4.92                                               |
| Skittles                          | 3.84                                               |
| Chewy Granola Bar (CC) (1)        | 4.2                                                |
| Chewy Granola Bar (PB) (1)        | 4.1                                                |
| Mini Bagel (Plain) (2)            | 2.79                                               |
| Philadelphia Cream Cheese (2 pck) | 3.21                                               |
| Mixed Nuts                        | 6.07                                               |
| Raisins (2 boxes)                 | 2.99                                               |
| Apple Slices (1 bag)              | 0.52                                               |
| Baby Carrots                      | 0.41                                               |
| String Cheese (1)                 | 2.55                                               |
| Greek Yogurt                      | 0.82                                               |
| Yoplait Yogurt                    | 1.02                                               |
| <b>Drinks</b>                     | <b>Approximate caloric content (kcal per gram)</b> |
| Coke                              | 0.37                                               |
| Diet Coke                         | 0.02                                               |
| Sprite                            | 0.40                                               |
| Honest Tea (Honey)                | 0.33                                               |
| Water                             | 0.00                                               |
| Vitamin Water                     | 0.21                                               |
| Starbucks Frappuccino ( Vanilla)  | 0.70                                               |

Supplemental Table 2. Foods and drinks available at the buffet along with the caloric content of each. Total energy available from the buffet meal was 4650kcal.

**SUPPLEMENTAL TABLE 3: ALL PARTICIPANTS BY SUBGROUPS**

| CHARACTERISTIC                    | All                        | Completed Glucose Food-Cue | Completed Water Food-Cue   | Completed Glucose Hormones | Completed Water Hormones   |
|-----------------------------------|----------------------------|----------------------------|----------------------------|----------------------------|----------------------------|
| SEX                               | Male: n=32<br>Female: n=40 | Male: n=32<br>Female: n=37 | Male: n=30<br>Female: n=38 | Male: n=29<br>Female: n=37 | Male: n=26<br>Female: n=36 |
| AGE (YEARS)                       | 23.22 ± 3.73               | 23.19 ± 3.77               | 23.23 ± 3.79               | 23.17 ± 3.58               | 23.1 ± 3.58                |
| BMI (KG/M <sup>2</sup> )          | 27.33 ± 5.13               | 27.19 ± 5.1                | 27.4 ± 5.12                | 27.29 ± 5.08               | 27.4 ± 5.22                |
| LEAN                              | n=25; 22.13 ± 1.67         | n=24; 22.03 ± 1.63         | n=23; 19.18 ± 1.71         | n=22; 22.11 ± 1.68         | n=22; 22.3 ± 1.71          |
| OVERWEIGHT                        | n=25; 26.93 ± 1.28         | n=25; 26.93 ± 1.28         | n=24; 26.83 ± 1.22         | n=25; 26.9 ± 1.28          | n=21; 26.85 ± 1.28         |
| OBESE                             | n=22; 33.68 ± 3.05         | n=20; 33.72 ± 3.05         | n=21; 33.73 ± 3.12         | n=19; 33.75 ± 3.25         | n=19; 33.91 ± 3.18         |
| PERCENT CALORIES FROM ADDED SUGAR | 9.31 ± 4.47                | 9.27 ± 4.53                | 9.47 ± 4.51                | 9.28 ± 4.49                | 9.36 ± 4.74                |
| LOW (<10%)                        | n=42; 6.59 ± 2.38          | n=41; 6.54 ± 2.33          | n=38; 6.55 ± 2.31          | n=40; 6.62 ± 2.2           | n=37; 6.48 ± 2.37          |
| HIGH (≥10%)                       | n=30; 13.16 ± 3.88         | n=28; 13.27 ± 3.97         | n=30; 13.16 ± 3.88         | n=26; 13.37 ± 4            | n=25; 13.63 ± 4.09         |

Supplemental Table 3. Participant characteristics separated by subgroups.



**SUPPLEMENTAL TABLE 4A: BMI STATUS**

| <b>CHARACTERISTIC</b>                    | <b>Lean</b>                | <b>Overweight</b>          | <b>Obese</b>              |
|------------------------------------------|----------------------------|----------------------------|---------------------------|
| <i>SEX</i>                               | Male: n=10<br>Female: n=15 | Male: n=15<br>Female: n=10 | Male: n=7<br>Female: n=15 |
| <i>AGE (YEARS)</i>                       | 24.31±4.1                  | 22.16±2.8                  | 23.18±4.02                |
| <i>BMI(KG/M<sup>2</sup>)</i>             | 22.13±1.67                 | 26.93±1.28                 | 33.68± 3.05               |
| <i>PERCENT CALORIES FROM ADDED SUGAR</i> | 8.46±3.93                  | 10.5±5.51                  | 8.92±3.52                 |
| <i>LOW (&lt;10%)</i>                     | n=14; 5.72±2.72            | n=13; 6.79±1.61            | n=15; 7.12±2.32           |
| <i>HIGH (≥10%)</i>                       | n=11; 11.94±1.91           | n=12; 14.51±5.45           | n=7; 12.77±2.34           |

**SUPPLEMENTAL TABLE 4B: HIGH VS LOW ADDED SUGAR**

| <b>CHARACTERISTIC</b>                    | <b>Low Added Sugar (&lt;10%)</b> | <b>High Added Sugar (≥10%)</b> |
|------------------------------------------|----------------------------------|--------------------------------|
| <i>SEX</i>                               | Male: n=19<br>Female: n=23       | Male: n=13<br>Female: n=17     |
| <i>AGE (YEARS)</i>                       | 23.54±3.96                       | 22.76±3.4                      |
| <i>BMI(KG/M<sup>2</sup>)</i>             | 27.71±5.54                       | 26.8±4.53                      |
| <i>LEAN</i>                              | n=14; 21.78±1.74                 | n=11; 22.59±1.55               |
| <i>OVERWEIGHT</i>                        | n=13; 27.13±1.49                 | n=12; 26.71±1.04               |
| <i>OBESE</i>                             | n=15; 33.74±3.28                 | n=7; 33.55±2.73                |
| <i>PERCENT CALORIES FROM ADDED SUGAR</i> | 6.55±2.31                        | 13.16±3.88                     |

Supplemental Table 4. (a) Participant characteristics separated by BMI Status, and (b) Participant characteristics separated by High vs Low Added Sugar.
